# Supplementary material
Source: PubMed Central journal article supplement (PMC4123233)
Supplement: NIHMS228817-supplement-01.pdf [file NIHMS228817-supplement-01.pdf]

# THE LANCET

## **Supplementary webappendix**

This webappendix formed part of the original submission and has been peer reviewed. We post it as supplied by the authors.

Supplement to: Ismail-Beigi F, Craven T, Banerji MA, et al. Effect of intensive treatment of hyperglycaemia on microvascular outcomes in type 2 diabetes: an analysis of the ACCORD randomised trial. *Lancet* 2010; published online June 29. DOI:10.1016/S0140-6736(10)60576-4.

## **Appendix**

Microvascular outcomes related to three main clinical areas (kidney function, diabetic eye complications, and peripheral neuropathy) were defined in the ACCORD protocol at study outset. Endpoints included in analyses are shown in Table 1 of the manuscript. Details of measurement for individual components of each clinical area are described below.

Kidney function: microvascular related kidney parameters were based on ACCORD Central Laboratory measurement of serum and urine creatinine, and urine albumin. Serum and urine creatinine were determined enzymatically on a Roche Double Modular P Analytics automated analyzer. Inter-assay precision is consistently <1.4% for the high and <2.2% for the low quality control samples. Urine microalbumin was determined by immunonephelometry on a Siemens BNII nephelometer. Sensitivity of the assay is 0.16 mg/dL with inter-assay CV's of 3.0%, 2.6% and 4.9% for control levels of 0.89 mg/dL, 6.6 mg/dL, and 16.1 mg/dL, respectively. All serum and urine samples were analyzed on the day of sample receipt. Estimated glomerular filtration rate (eGFR) was also calculated at each serum creatinine measurement using the 4-variable MDRD Study equation:  $eGFR = 186 \times (\text{serum creatinine})^{-1.154} \times \text{age}^{-0.203} \times 1.212 \text{ (if black)} \times 0.742 \text{ (if female)}$ .<sup>1</sup> In addition to laboratory assays to measure renal function, follow-up surveillance for dialysis, end-stage renal disease, and renal transplantation was performed by updated medical history at four month clinic visits throughout the trial.

Diabetic eye complications: assessment of eye surgeries for diabetes related conditions (photocoagulation or vitrectomy for retinopathy, and cataract removal) was performed by participant self report at annual follow-up clinic visits. At each annual exam, participants were asked whether or not they "...had eye surgery, including laser photocoagulation, during the past year..." with areas provided to specify "retinal laser photocoagulation for diabetic retinopathy" or "vitrectomy for diabetic retinopathy", and "cataract removal" or "yag laser for cataract capsule".

In addition to questions regarding eye surgery within the last year, ACCORD participants had an eye exam to assess visual acuity at baseline, every two years during follow-up, and at exit from the study. This exam included assessment of visual

acuity using the R chart of the Lighthouse Distance Visual Acuity Test charts (Lighthouse Low Vision Products, 36-02 Northern Boulevard, Long Island, New York 11101), which are modified Early Treatment Diabetic Retinopathy Study (ETDRS) charts. Testing was performed at a distance of 4 meters and, for patients with sufficiently reduced vision, at 1 meter. Participants were assessed for “habitual vision” with usual correction for the distance utilizing current distance glasses or contacts. Participants with visual acuity score of 70 or less (Snellen fraction less than 20/40), were referred to their ophthalmologist for follow-up exam. Participants with a decrease in baseline visual acuity score  $\geq 15$  units in either eye at any follow-up exam were considered to have outcome Eye-3 (a 3-line or greater worsening in visual acuity).

Peripheral Neuropathy: assessment of diabetic neuropathy in the extremities was performed annually via a standardized clinical exam in the ACCORD study sites. Neuropathic signs were assessed using the Michigan Neuropathy Screening Instrument (MNSI) examination, which comprises a structured assessment of the feet to identify deformities, dry skin, calluses, infection, fissure, or ulcers; and evaluation of ankle reflexes and vibration sensation in the great toe. For this study, neuropathy was defined operationally as a score  $>2.0$  on the MNSI examination, a threshold defined by prior validation studies.<sup>2</sup>

## **Appendix References**

1. Levey AS, Coresh J, Greene T, Stevens LA, Zhang Y, Hendriksen S, Kusek JW, Van Lente F. Using standardized serum creatinine values in the Modification of Diet in Renal Disease study equation for estimating glomerular filtration rate. *Ann Intern Med* 2006; **145**: 247-54.
2. Feldman EL, Stevens MJ, Thomas PK, Brown MB, Canal N, Greene DA. A practical two-step quantitative clinical and electrophysiological assessment for the diagnosis and staging of diabetic neuropathy. *Diabetes Care* 1994; **17**: 1281-9.

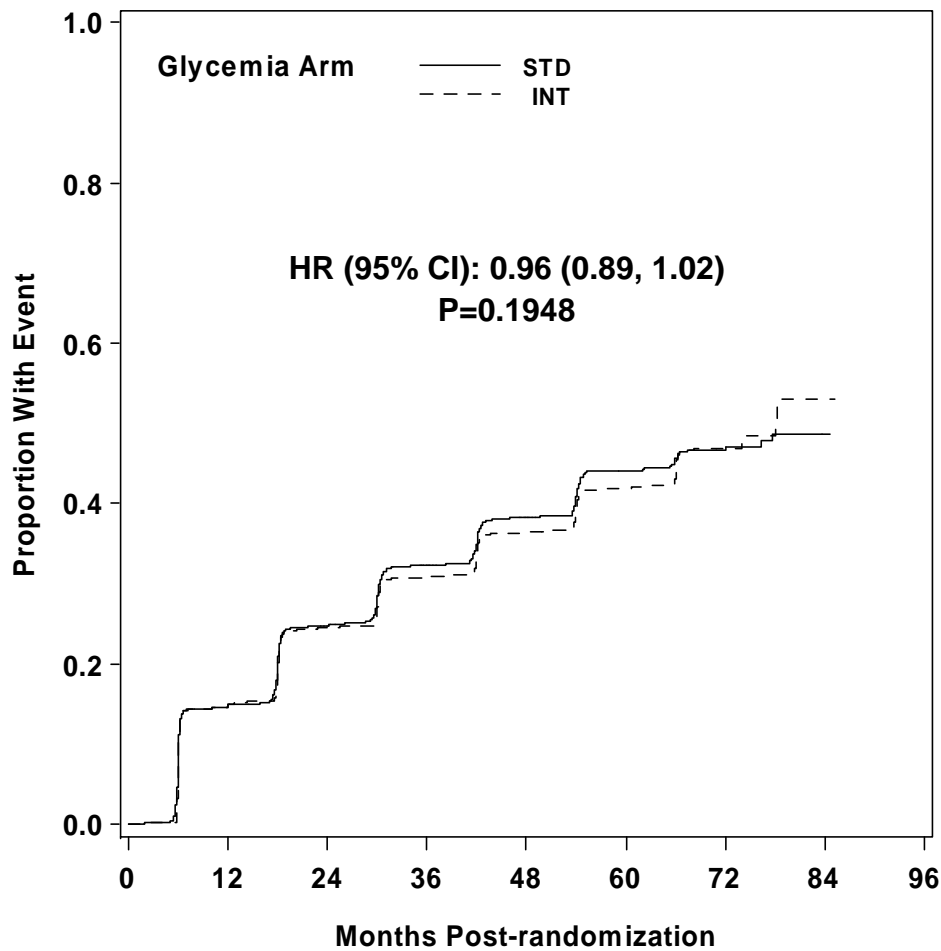

**Follow-up numbers at risk**

| Month | 12   | 24   | 36   | 48   | 60  | 72  | 84 |
|-------|------|------|------|------|-----|-----|----|
|       | 8301 | 6385 | 3856 | 1668 | 550 | 280 | 4  |

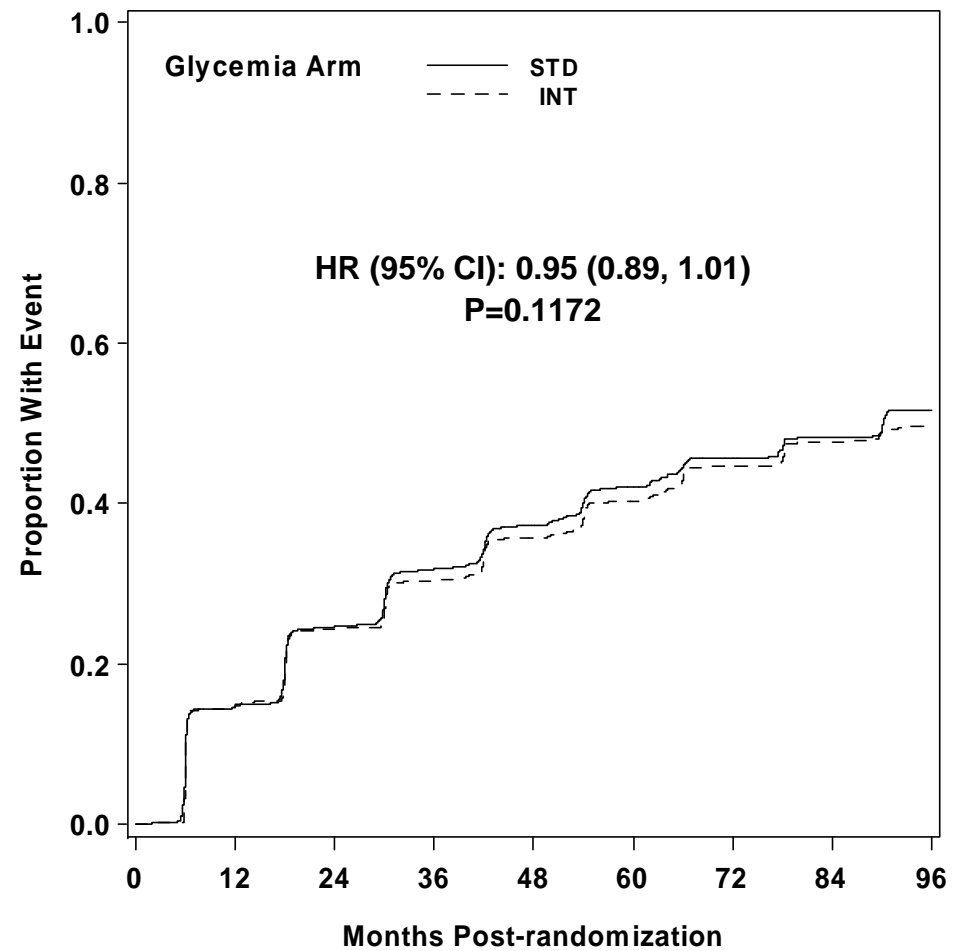

**Follow-up numbers at risk**

| Month | 12   | 24   | 36   | 48   | 60   | 72  | 84  | 96 |
|-------|------|------|------|------|------|-----|-----|----|
|       | 8374 | 7215 | 6357 | 4805 | 2680 | 803 | 454 | 1  |

**Figure A1.** Kaplan-Meier curves for the microvascular secondary composite outcome (development of renal failure or retinal photocoagulation or vitrectomy to treat retinopathy, or score >2.0 on MNSI) by glycemia arm. Panel A: data until transition of intensive glycemia arm to standard therapy (N=10215). Panel B: all data through end of study (N=10234). Hazard ratios adjusted for baseline history of clinical cardiovascular disease and second trial treatment arm assignment.

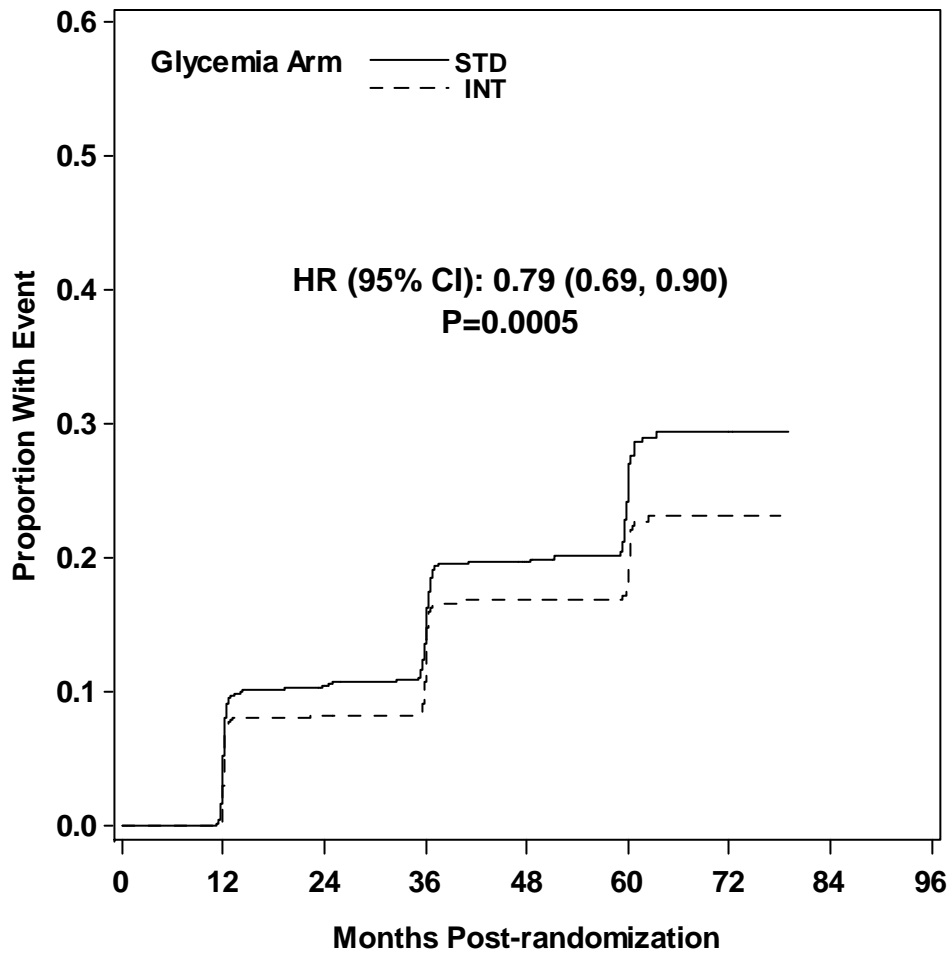

**Follow-up numbers at risk**

| Month | 12   | 24   | 36   | 48   | 60  | 72  | 84 |
|-------|------|------|------|------|-----|-----|----|
|       | 6190 | 4442 | 2382 | 1469 | 459 | 259 | 0  |

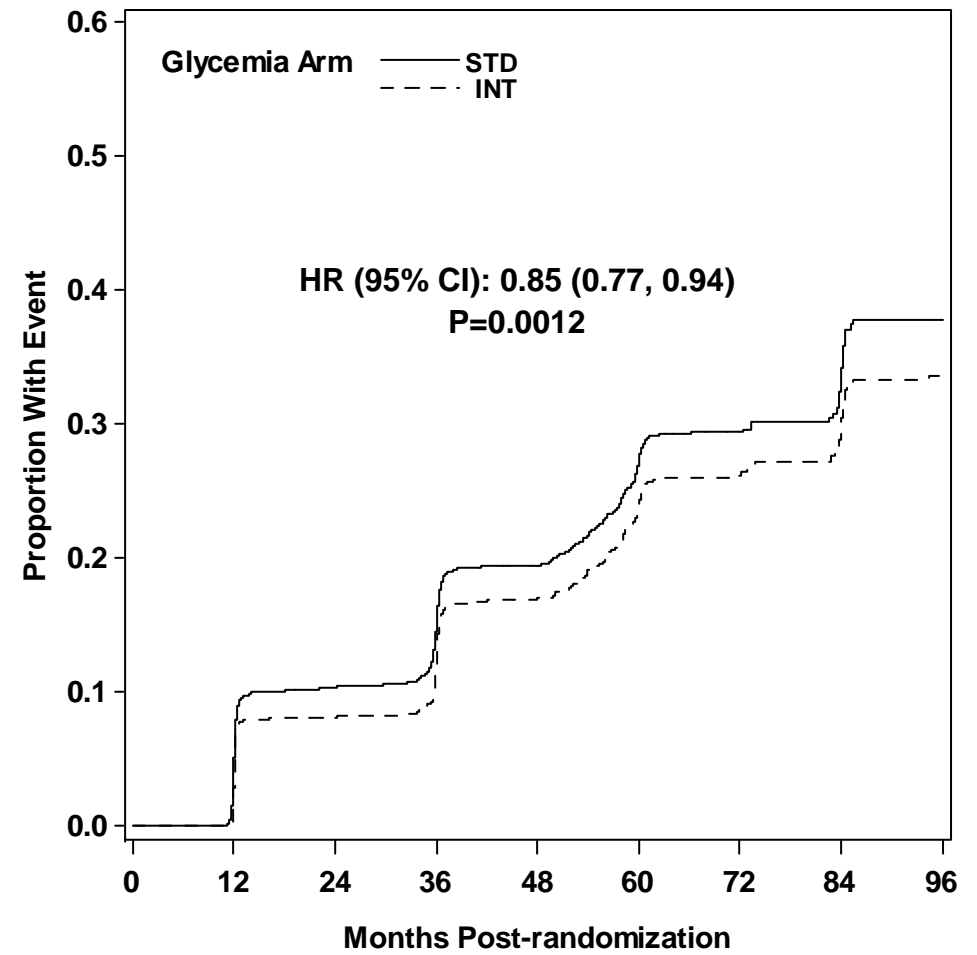

**Follow-up numbers at risk**

| Month | 12   | 24   | 36   | 48   | 60   | 72  | 84  | 96 |
|-------|------|------|------|------|------|-----|-----|----|
|       | 6277 | 5794 | 5337 | 4220 | 2360 | 736 | 424 | 1  |

**Figure A2.** Kaplan-Meier curves for microvascular outcome Neph-1 (development of microalbuminuria) by glycemia arm. Panel A: data until transition of intensive glycemia arm to standard therapy (N=6436). Panel B: all data through end of study (N=6523). Hazard ratios adjusted for baseline history of clinical cardiovascular disease and second trial treatment arm assignment.

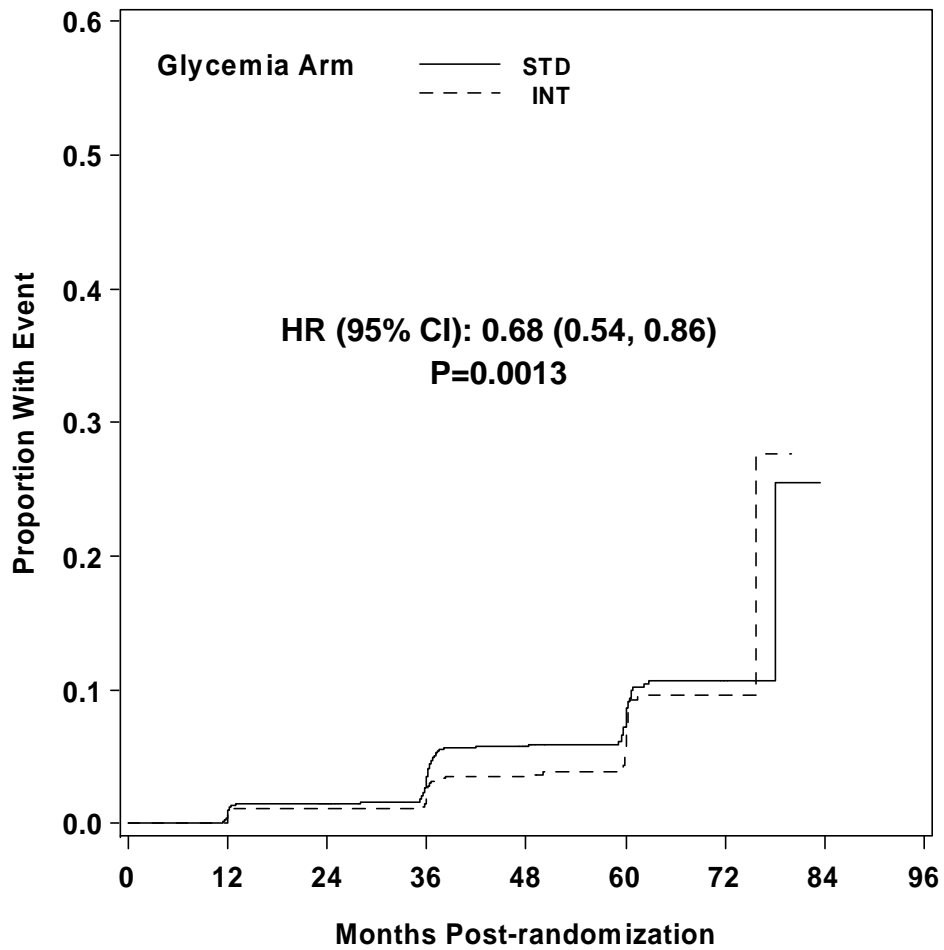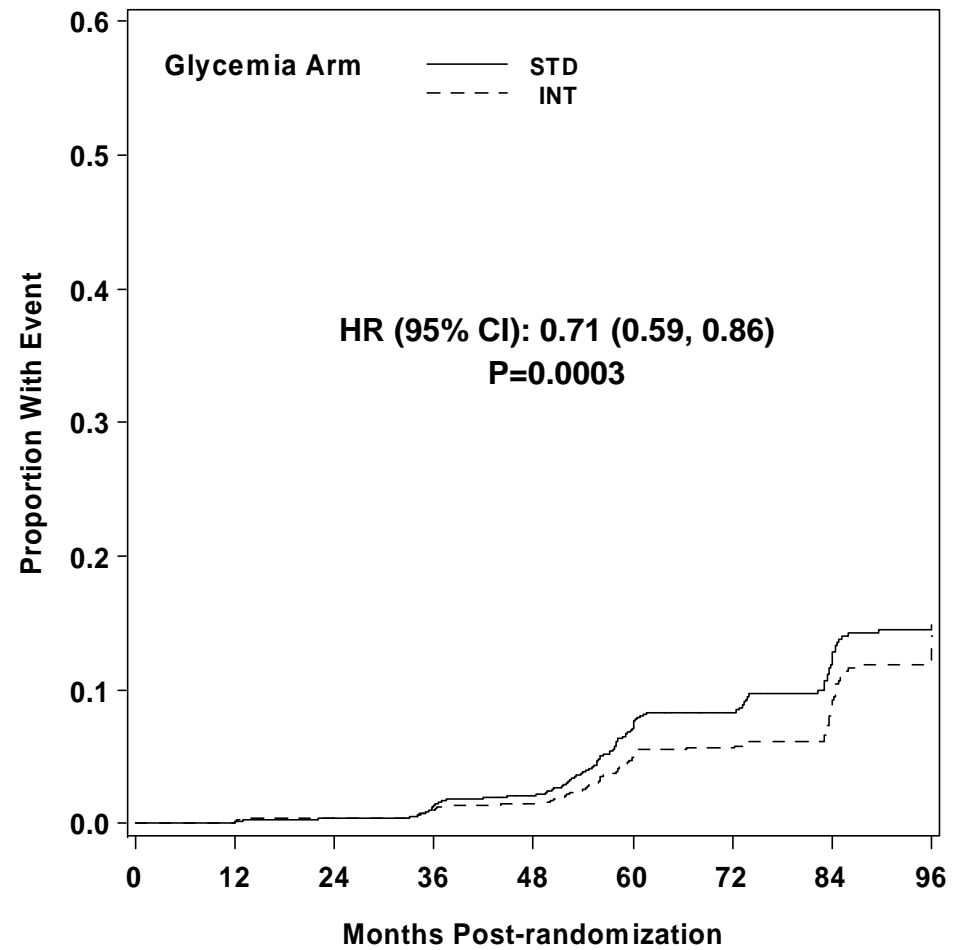

**Follow-up numbers at risk**

| Month | 12   | 24   | 36   | 48   | 60  | 72  | 84 |
|-------|------|------|------|------|-----|-----|----|
|       | 8645 | 6551 | 3632 | 2358 | 753 | 424 | 0  |

**Follow-up numbers at risk**

| Month | 12   | 24   | 36   | 48   | 60   | 72   | 84  | 96  |
|-------|------|------|------|------|------|------|-----|-----|
|       | 8812 | 8586 | 8184 | 6841 | 4010 | 1314 | 749 | 392 |

**Figure A3.** Kaplan-Meier curves for microvascular outcome Neph-2 (development of macroalbuminuria) by glycemia arm. Panel A: data until transition of intensive glycemia arm to standard therapy (N=8695). Panel B: all data through end of study (N=8821). Hazard ratios adjusted for baseline history of clinical cardiovascular disease and second trial treatment arm assignment.

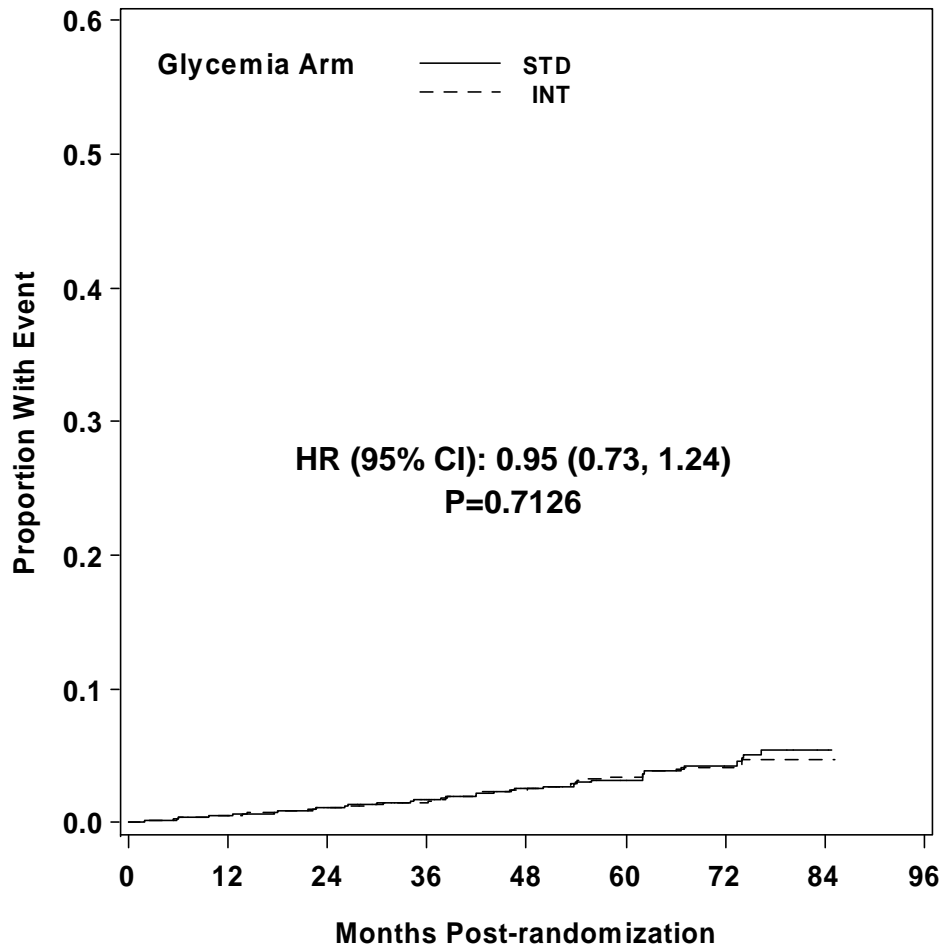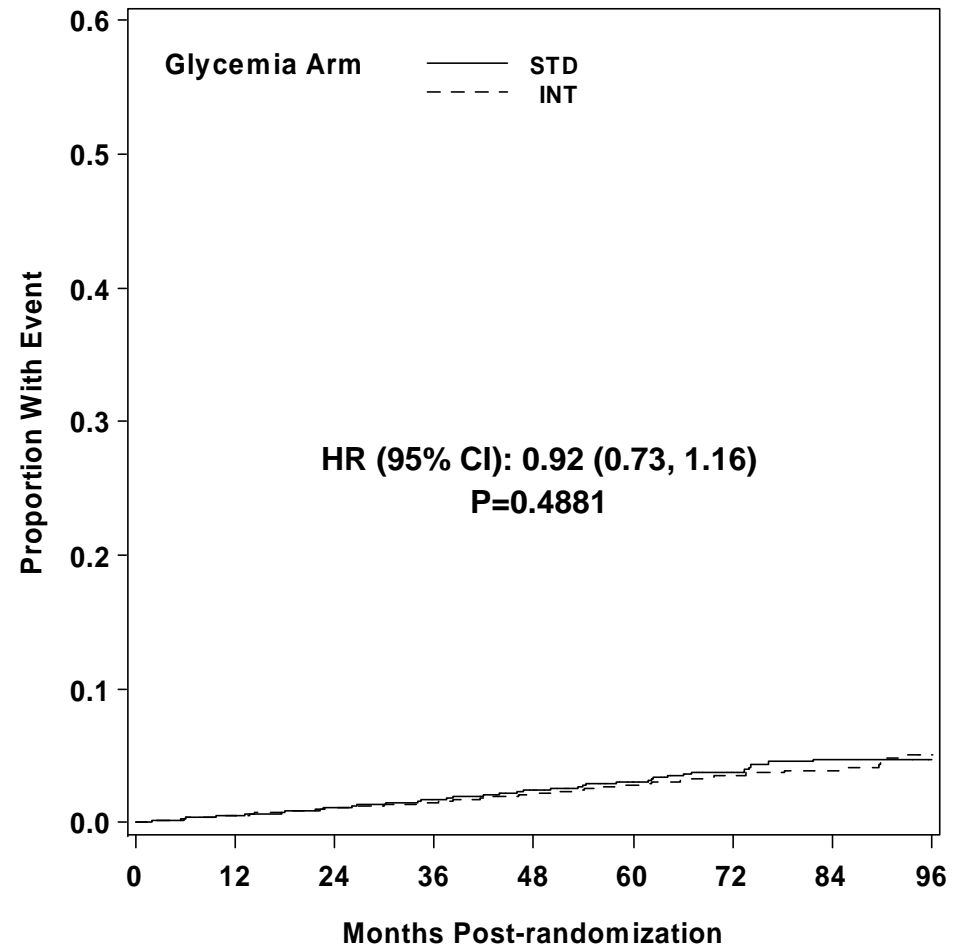

**Follow-up numbers at risk**

| Month | 12   | 24   | 36   | 48   | 60  | 72  | 84 |
|-------|------|------|------|------|-----|-----|----|
|       | 9768 | 9033 | 6164 | 3124 | 953 | 765 | 8  |

**Follow-up numbers at risk**

| Month | 12   | 24   | 36   | 48   | 60   | 72   | 84  | 96 |
|-------|------|------|------|------|------|------|-----|----|
|       | 9820 | 9497 | 9151 | 7480 | 4516 | 1462 | 870 | 1  |

**Figure A4.** Kaplan-Meier curves for microvascular outcome Neph-3 (development of renal failure, renal transplant, or serum creatinine > 291.7 micromol/L) by glycemia arm. Panel A: data until transition of intensive glycemia arm to standard therapy (N=10215). Panel B: all data through end of study (N=10234). Hazard ratios adjusted for baseline history of clinical cardiovascular disease and second trial treatment arm

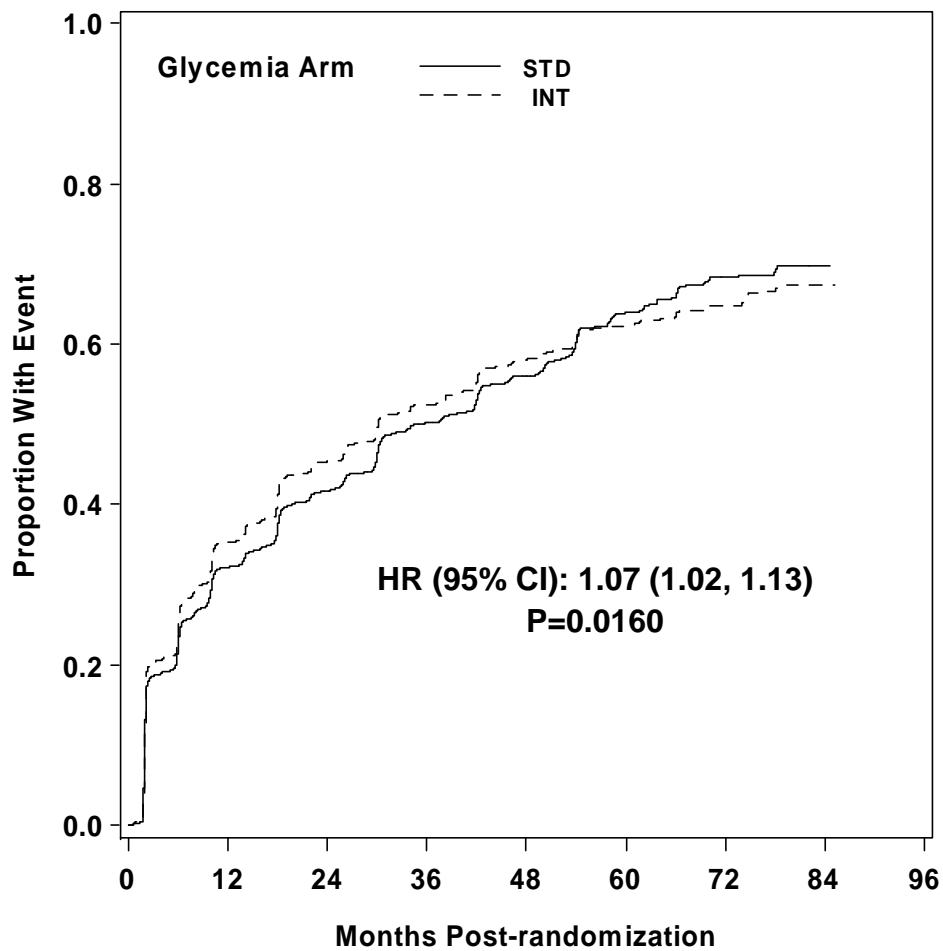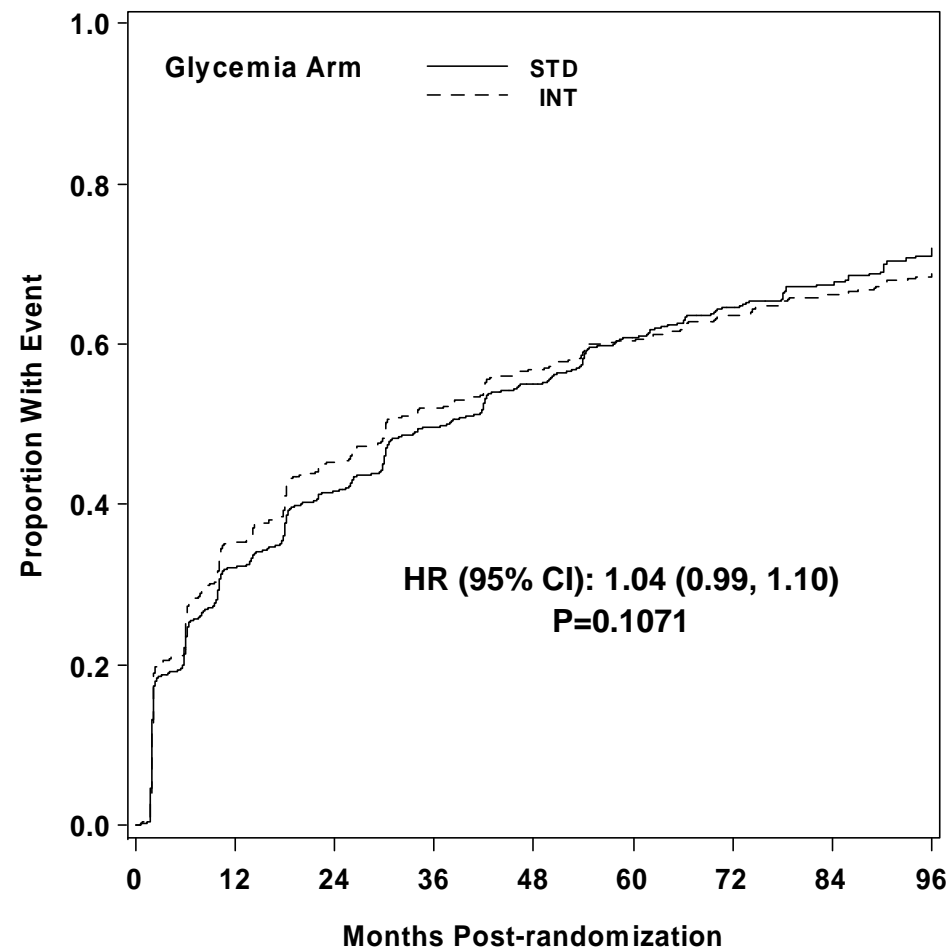

**Follow-up numbers at risk**

| Month | 12   | 24   | 36   | 48   | 60  | 72  | 84 |
|-------|------|------|------|------|-----|-----|----|
|       | 6428 | 5081 | 3041 | 1406 | 347 | 249 | 3  |

**Follow-up numbers at risk**

| Month | 12   | 24   | 36   | 48   | 60   | 72  | 84  | 96  |
|-------|------|------|------|------|------|-----|-----|-----|
|       | 6447 | 5363 | 4514 | 3289 | 1821 | 536 | 272 | 128 |

**Figure A5.** Kaplan-Meier curves for microvascular outcome Neph-4 (doubling of serum creatinine or more than 20 mL/min/1.73m<sup>2</sup> decrease in estimated GFR) by glycemia arm. Panel A: data until transition of intensive glycemias arm to standard therapy (N=10069). Panel B: all data through end of study (N=10076). Hazard ratios adjusted for baseline history of clinical cardiovascular disease and second trial treatment arm assignment.



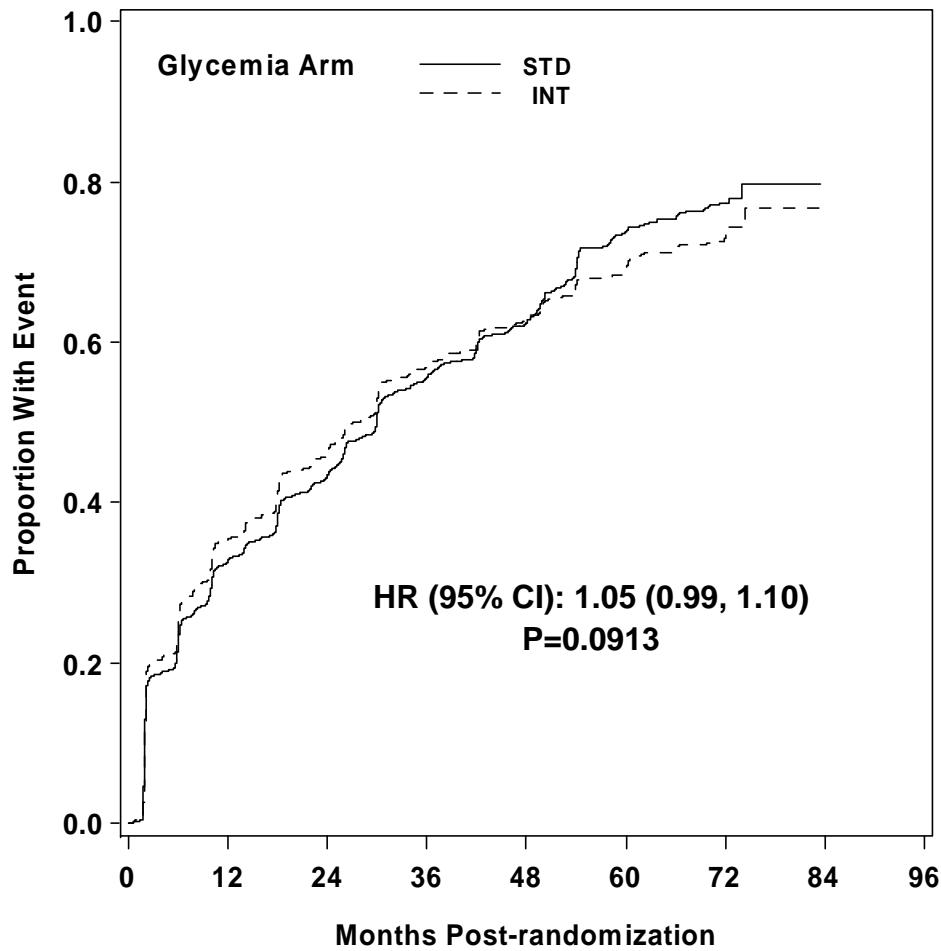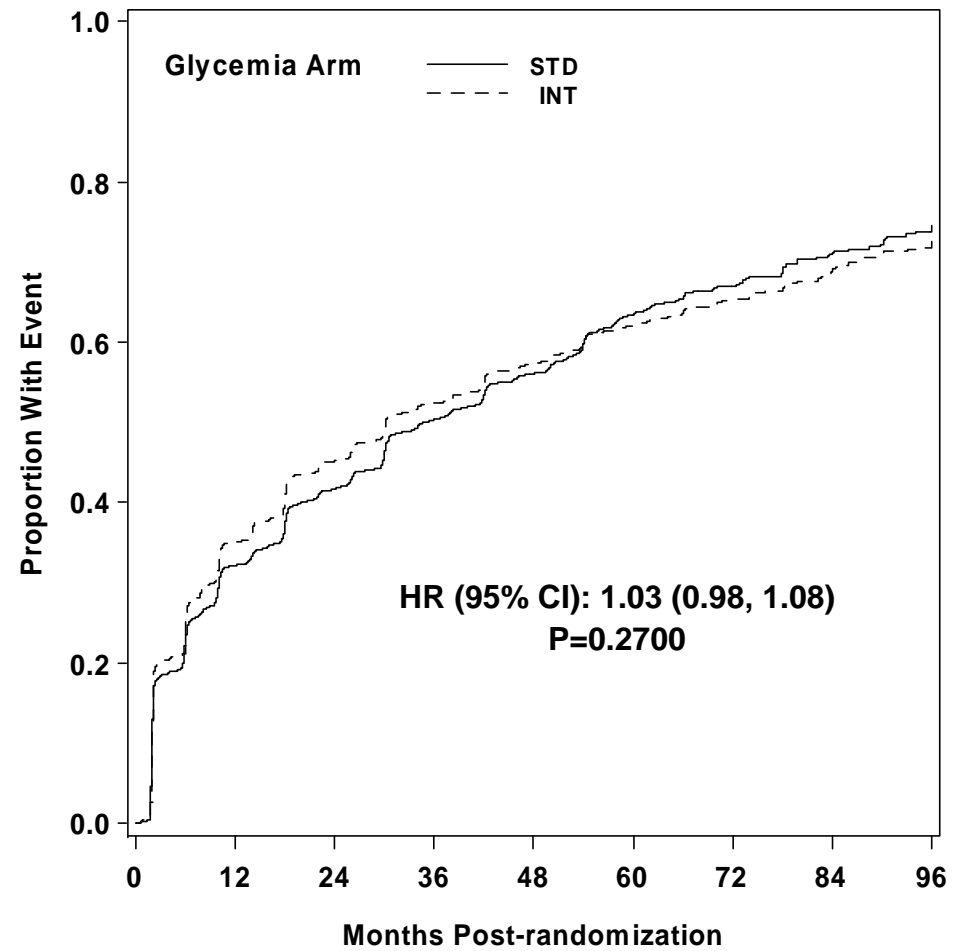

**Follow-up numbers at risk**

| Month | 12   | 24   | 36   | 48   | 60  | 72  | 84 |
|-------|------|------|------|------|-----|-----|----|
|       | 6472 | 4268 | 2071 | 1217 | 309 | 169 | 0  |

**Follow-up numbers at risk**

| Month | 12   | 24   | 36   | 48   | 60   | 72  | 84  | 96  |
|-------|------|------|------|------|------|-----|-----|-----|
|       | 6551 | 5368 | 4457 | 3286 | 1751 | 530 | 271 | 136 |

**Figure A6.** Kaplan-Meier curves for microvascular renal composite outcome Neph-5 (development of any of three conditions Neph-2, Neph-3, or Neph-4) by glycemia arm. Panel A: data until transition of intensive glycemia arm to standard therapy (N=10215). Panel B: all data through end of study (N=10234). Hazard ratios adjusted for baseline history of clinical cardiovascular disease and second trial treatment arm assignment.

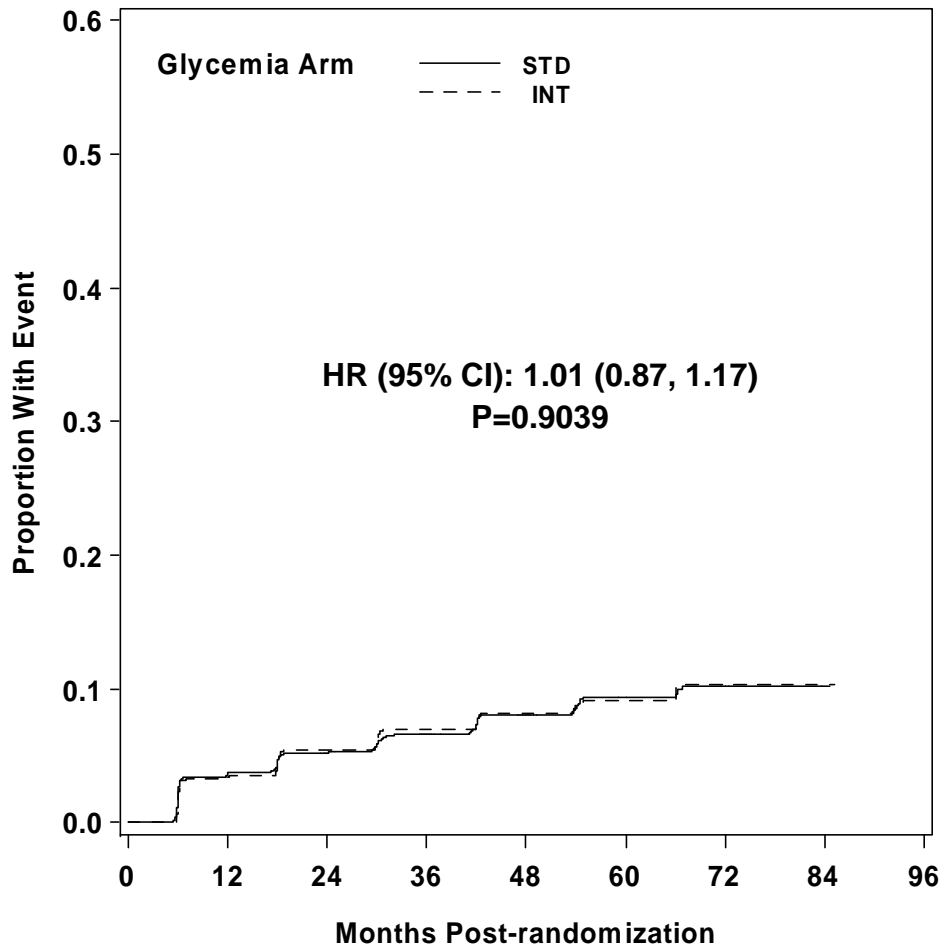

**Follow-up numbers at risk**

| Month | 12   | 24   | 36   | 48   | 60  | 72  | 84 |
|-------|------|------|------|------|-----|-----|----|
|       | 9334 | 8023 | 5330 | 2465 | 875 | 479 | 8  |

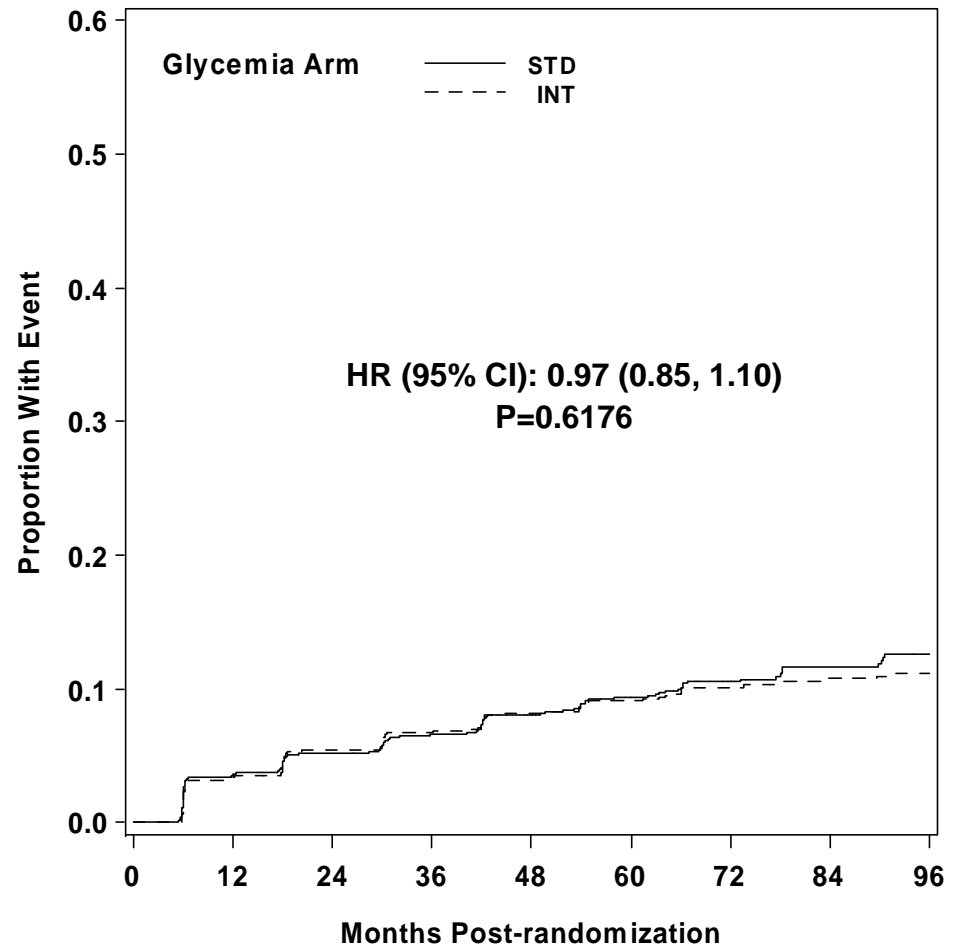

**Follow-up numbers at risk**

| Month | 12   | 24   | 36   | 48   | 60   | 72   | 84  | 96 |
|-------|------|------|------|------|------|------|-----|----|
|       | 9422 | 9057 | 8688 | 7046 | 4220 | 1346 | 800 | 1  |

**Figure A7.** Kaplan-Meier curves for microvascular outcome Eye-1 (retinal photocoagulation or vitrectomy to treat retinopathy) by glycemia arm. Panel A: data until transition of intensive glycemia arm to standard therapy (N=9796). Panel B: all data through end of study (N=9848). Hazard ratios adjusted for baseline history of clinical cardiovascular disease and second trial treatment arm assignment.

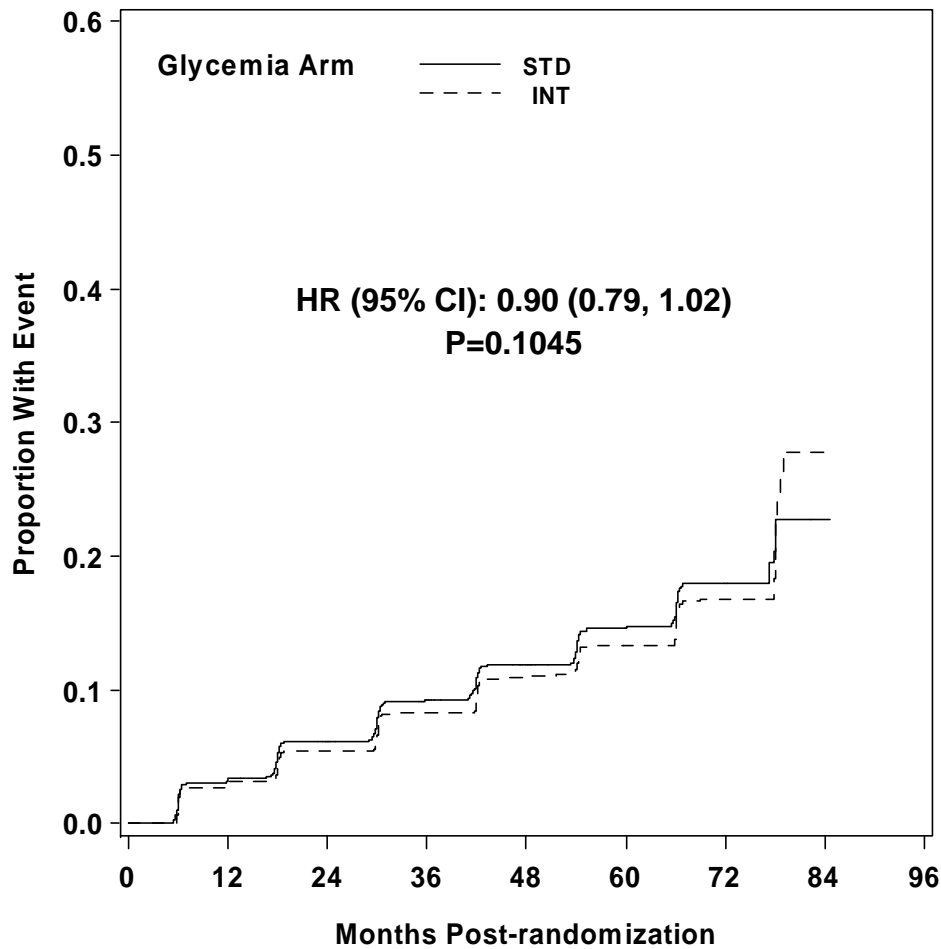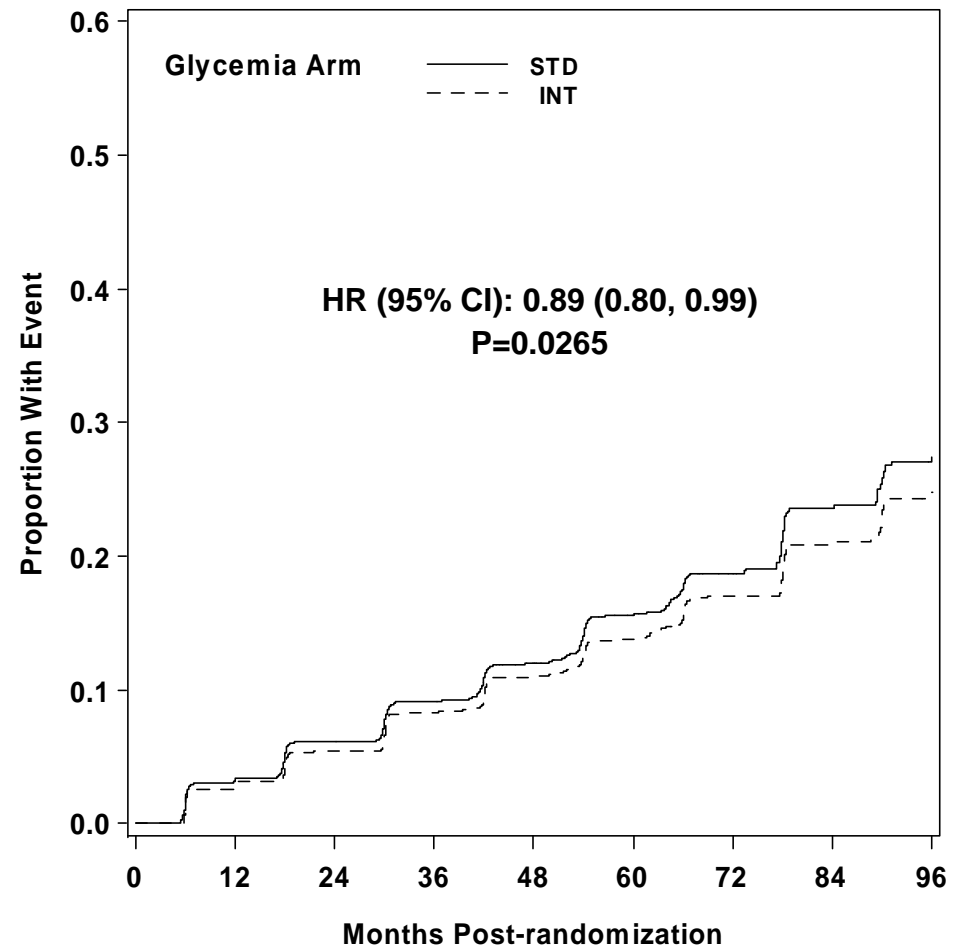

**Follow-up numbers at risk**

| Month | 12   | 24   | 36   | 48   | 60  | 72  | 84 |
|-------|------|------|------|------|-----|-----|----|
|       | 9379 | 7996 | 5253 | 2415 | 847 | 455 | 8  |

**Follow-up numbers at risk**

| Month | 12   | 24   | 36   | 48   | 60   | 72   | 84  | 96  |
|-------|------|------|------|------|------|------|-----|-----|
|       | 9466 | 9016 | 8509 | 6858 | 3986 | 1272 | 721 | 371 |

**Figure A8.** Kaplan-Meier curves for microvascular outcome Eye-2 (surgery for cataract extraction) by glycemia arm. Panel A: data until transition of intensive glycemia arm to standard therapy (N=9796). Panel B: all data through end of study (N=9848). Hazard ratios adjusted for baseline history of clinical cardiovascular disease and second trial treatment arm assignment.

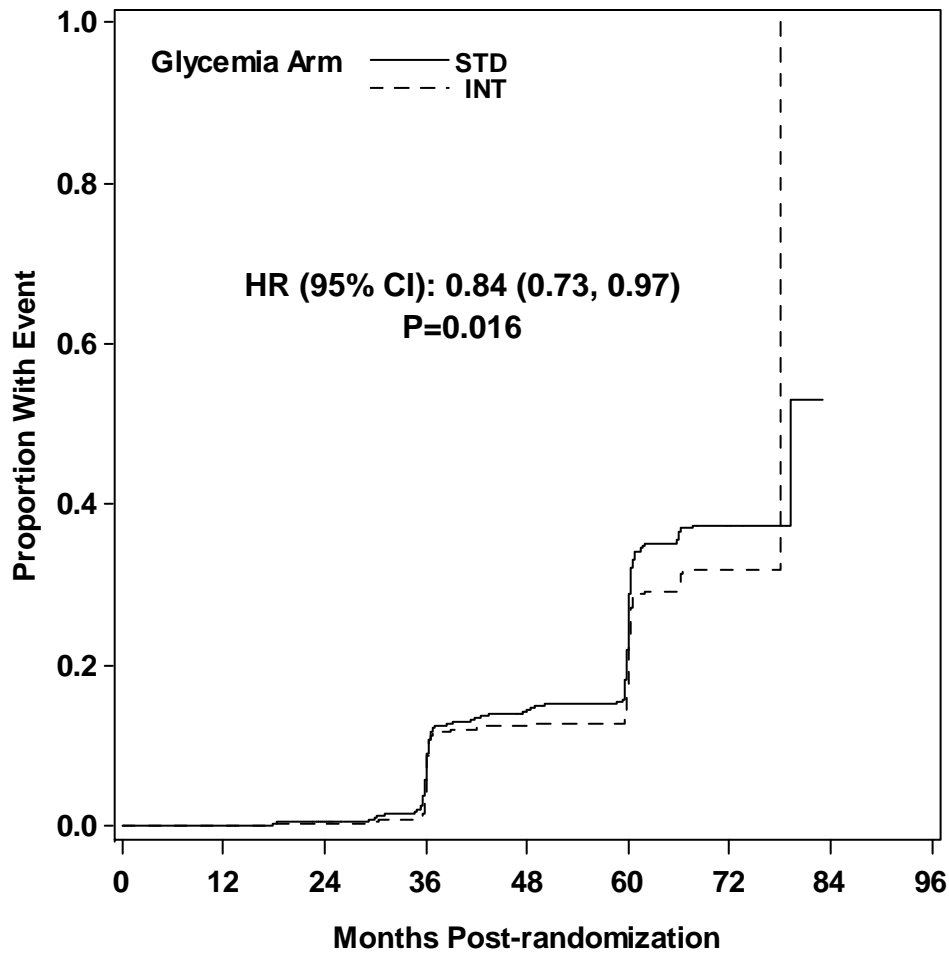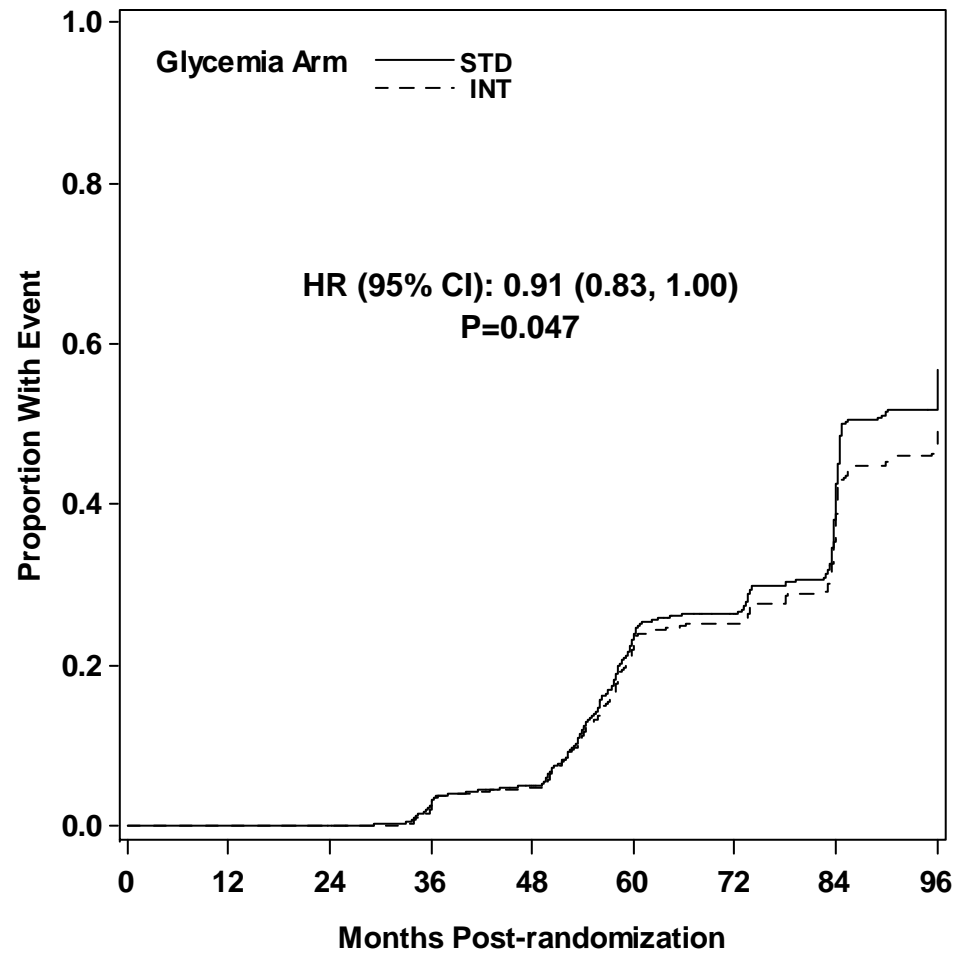

**Follow-up numbers at risk**

| Month | 12   | 24   | 36   | 48   | 60  | 72  | 84 |
|-------|------|------|------|------|-----|-----|----|
|       | 8880 | 6802 | 3752 | 2281 | 814 | 379 | 0  |

**Follow-up numbers at risk**

| Month | 12   | 24   | 36   | 48   | 60   | 72   | 84  | 96  |
|-------|------|------|------|------|------|------|-----|-----|
|       | 9392 | 9133 | 8565 | 7076 | 3675 | 1308 | 702 | 309 |

**Figure A9.** Kaplan-Meier curves for microvascular outcome Eye-3 (three line change in visual acuity) by glycemia arm. Panel A: data until transition of intensive glycemia arm to standard therapy (N=8933). Panel B: all data through end of study (N=9640). Hazard ratios adjusted for baseline history of clinical cardiovascular disease and second trial treatment arm assignment.

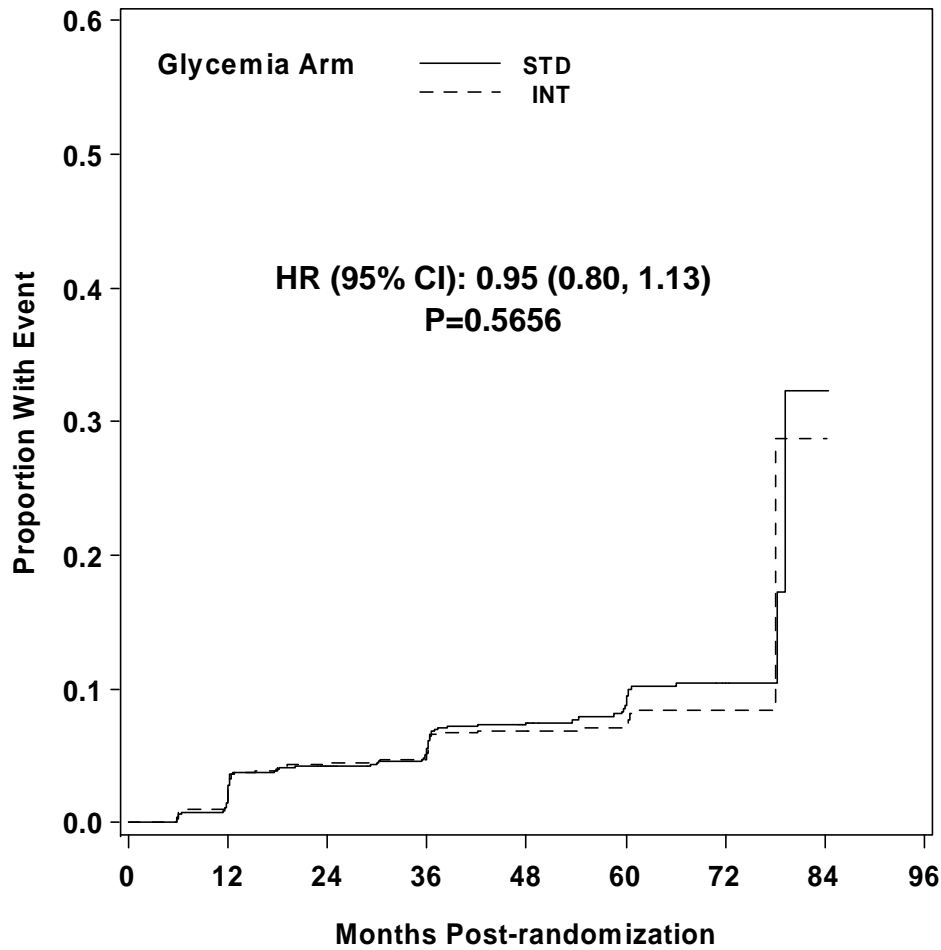

**Follow-up numbers at risk**

| Month | 12   | 24   | 36   | 48   | 60  | 72  | 84 |
|-------|------|------|------|------|-----|-----|----|
|       | 9092 | 6782 | 3745 | 2378 | 824 | 452 | 1  |

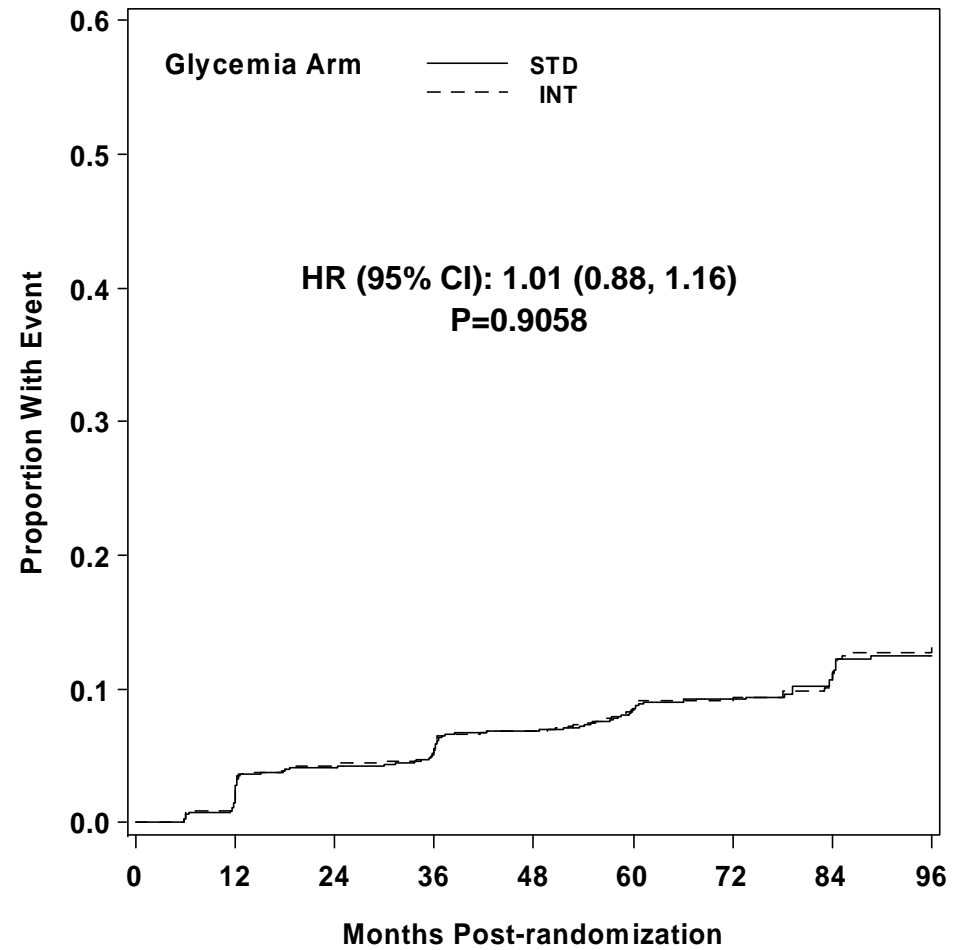

**Follow-up numbers at risk**

| Month | 12   | 24   | 36   | 48   | 60   | 72   | 84  | 96  |
|-------|------|------|------|------|------|------|-----|-----|
|       | 9279 | 8823 | 8339 | 6804 | 3984 | 1275 | 723 | 376 |

**Figure A10.** Kaplan-Meier curves for microvascular outcome Eye-4 (severe vision loss) by glycemia arm. Panel A: data until transition of intensive glycemia arm to standard therapy (N=9340). Panel B: all data through end of study (N=9522). Hazard ratios adjusted for baseline history of clinical cardiovascular disease and second trial treatment arm assignment.

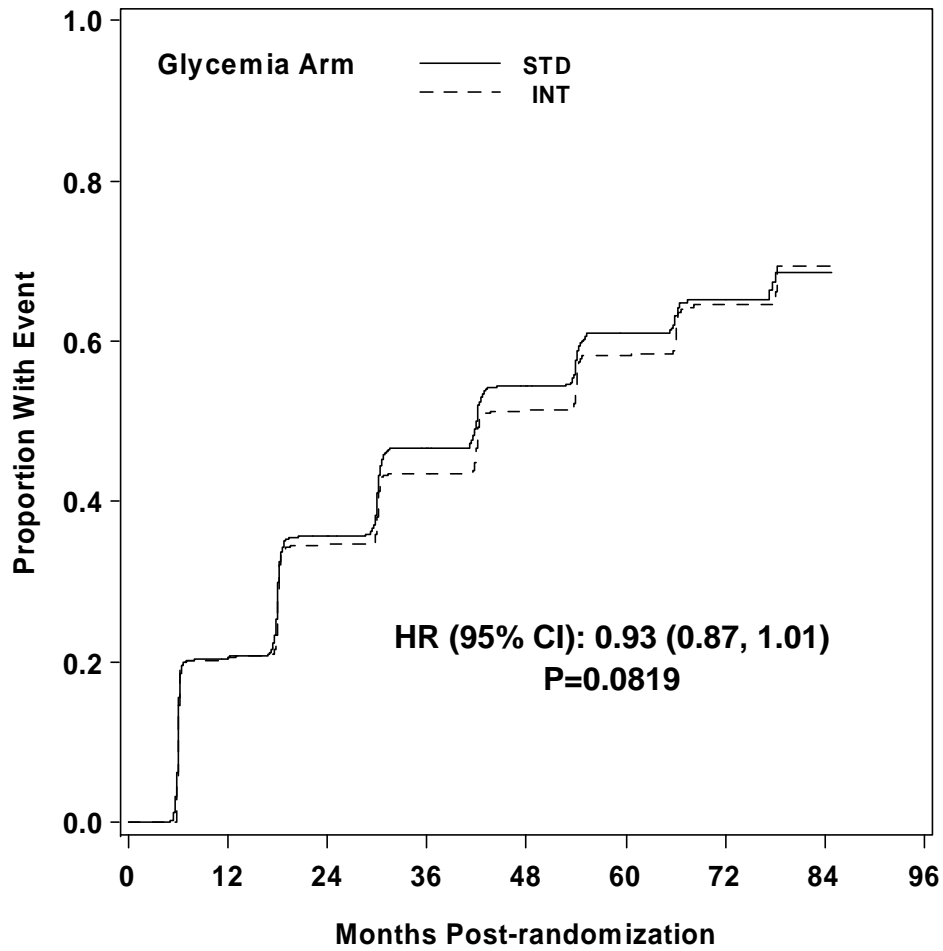

**Follow-up numbers at risk**

| Month | 12   | 24   | 36   | 48  | 60  | 72  | 84 |
|-------|------|------|------|-----|-----|-----|----|
|       | 4386 | 3141 | 1811 | 755 | 242 | 116 | 4  |

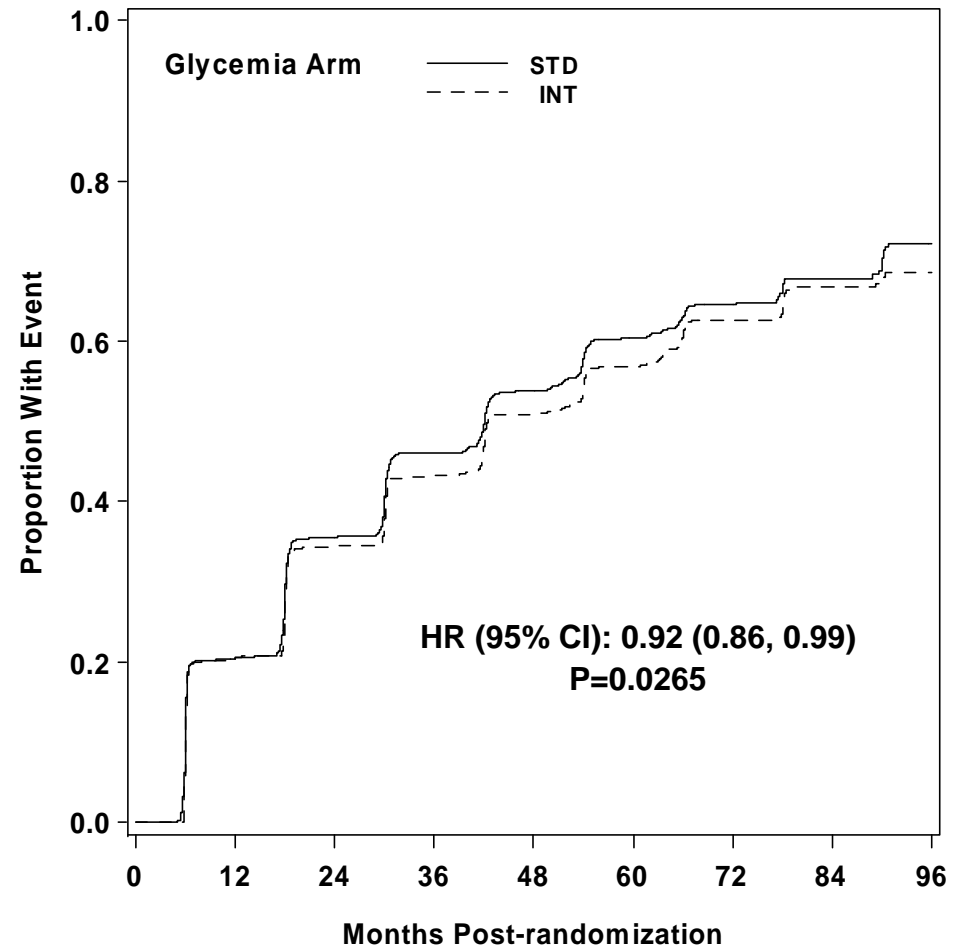

**Follow-up numbers at risk**

| Month | 12   | 24   | 36   | 48   | 60   | 72  | 84  | 96 |
|-------|------|------|------|------|------|-----|-----|----|
|       | 4419 | 3533 | 2908 | 2065 | 1106 | 335 | 166 | 1  |

**Figure A11.** Kaplan-Meier curves for microvascular outcome Neuro-1 (score of >2.0 on the Michigan Neuropathy Screening Instrument) by glycemia arm. Panel A: data until transition of intensive glycemia arm to standard therapy (N=5606). Panel B: all data through end of study (N=5626). Hazard ratios adjusted for baseline history of clinical cardiovascular disease and second trial treatment arm assignment.

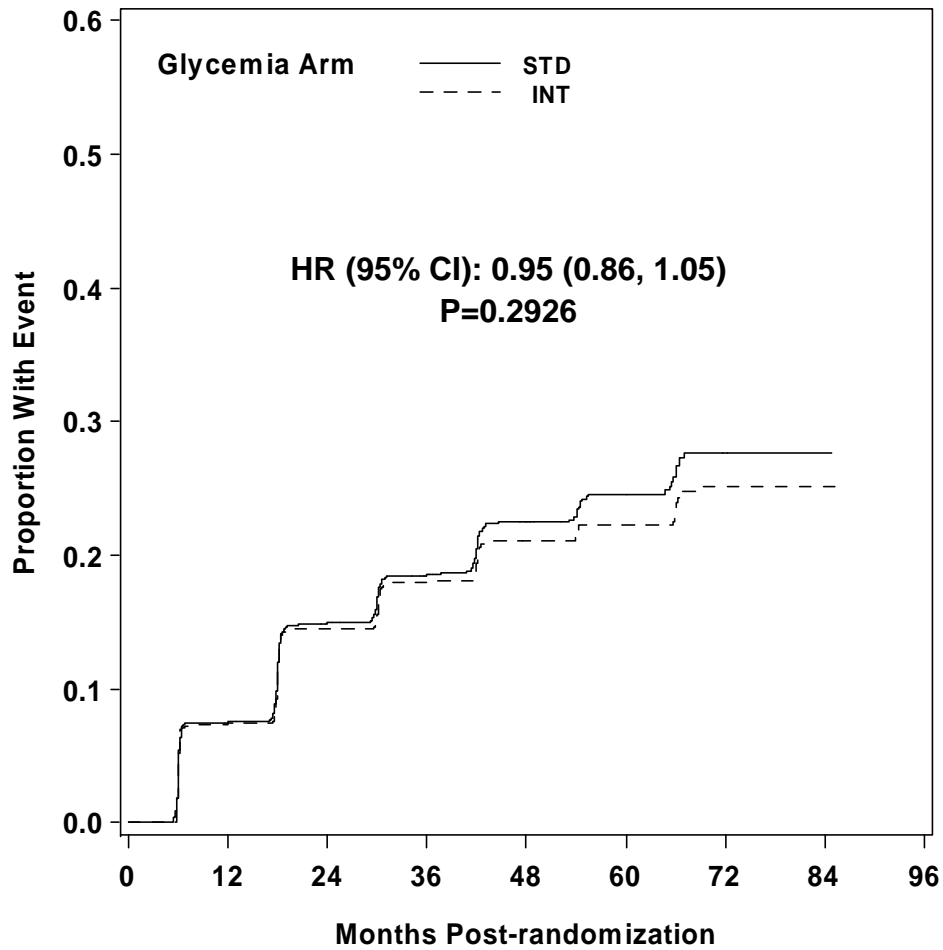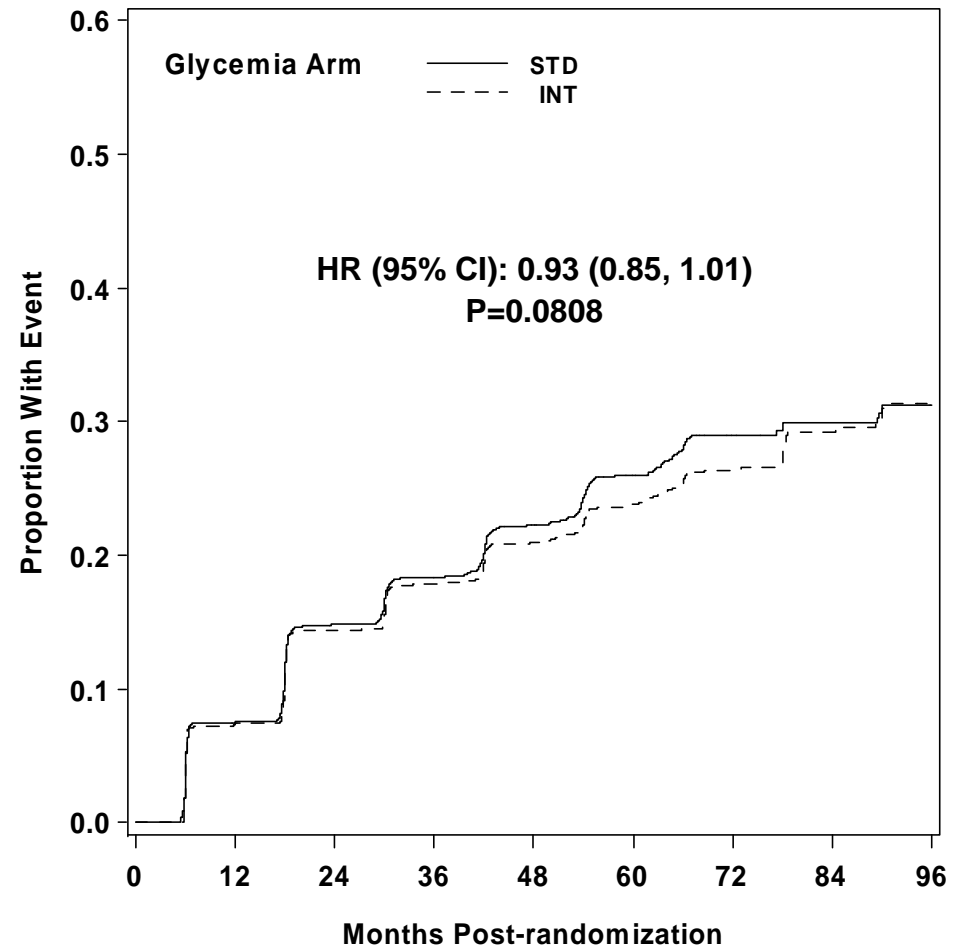

**Follow-up numbers at risk**

| Month | 12   | 24   | 36   | 48   | 60  | 72  | 84 |
|-------|------|------|------|------|-----|-----|----|
|       | 7656 | 6286 | 4236 | 1970 | 606 | 331 | 32 |

**Follow-up numbers at risk**

| Month | 12   | 24   | 36   | 48   | 60   | 72  | 84  | 96 |
|-------|------|------|------|------|------|-----|-----|----|
|       | 7705 | 6921 | 6447 | 5030 | 2899 | 851 | 463 | 1  |

**Figure A12.** Kaplan-Meier curves for microvascular outcome Neuro-2 (loss of vibratory sensation) by glycemia arm. Panel A: data until transition of intensive glycemia arm to standard therapy (N=8418). Panel B: all data through end of study (N=8444). Hazard ratios adjusted for baseline history of clinical cardiovascular disease and second trial treatment arm assignment.

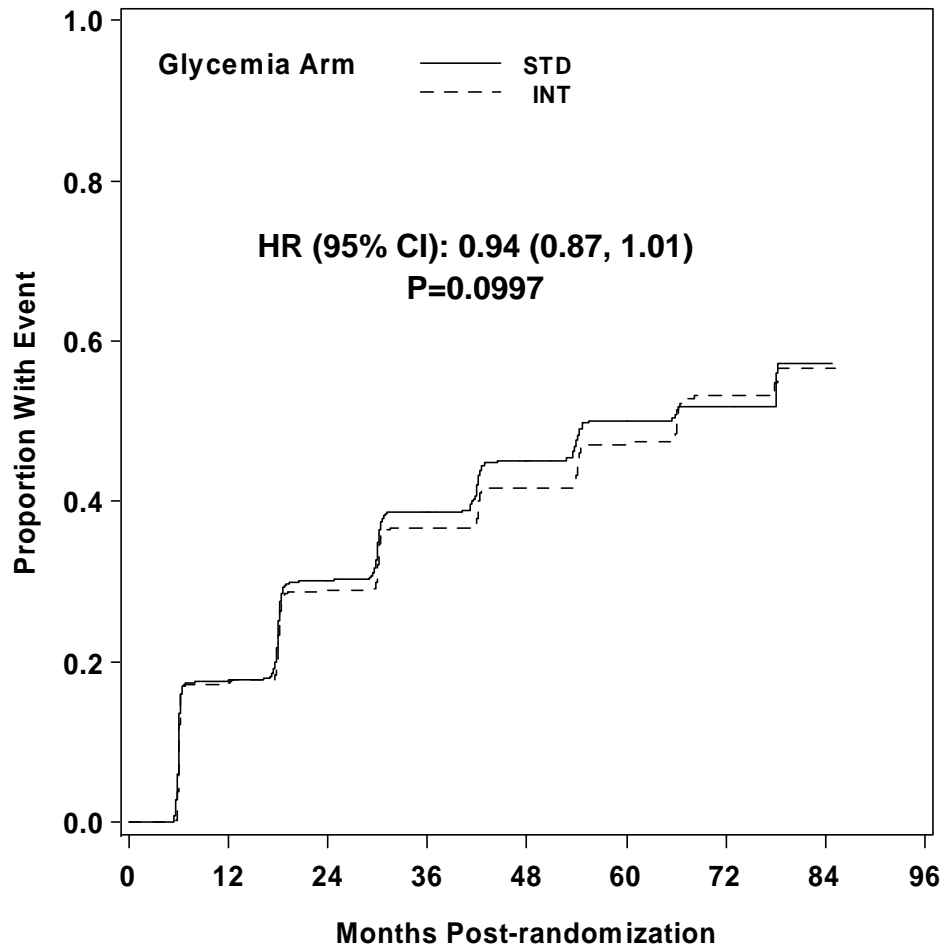

**Follow-up numbers at risk**

| Month | 12   | 24   | 36   | 48  | 60  | 72  | 84 |
|-------|------|------|------|-----|-----|-----|----|
|       | 5300 | 3947 | 2352 | 975 | 310 | 167 | 5  |

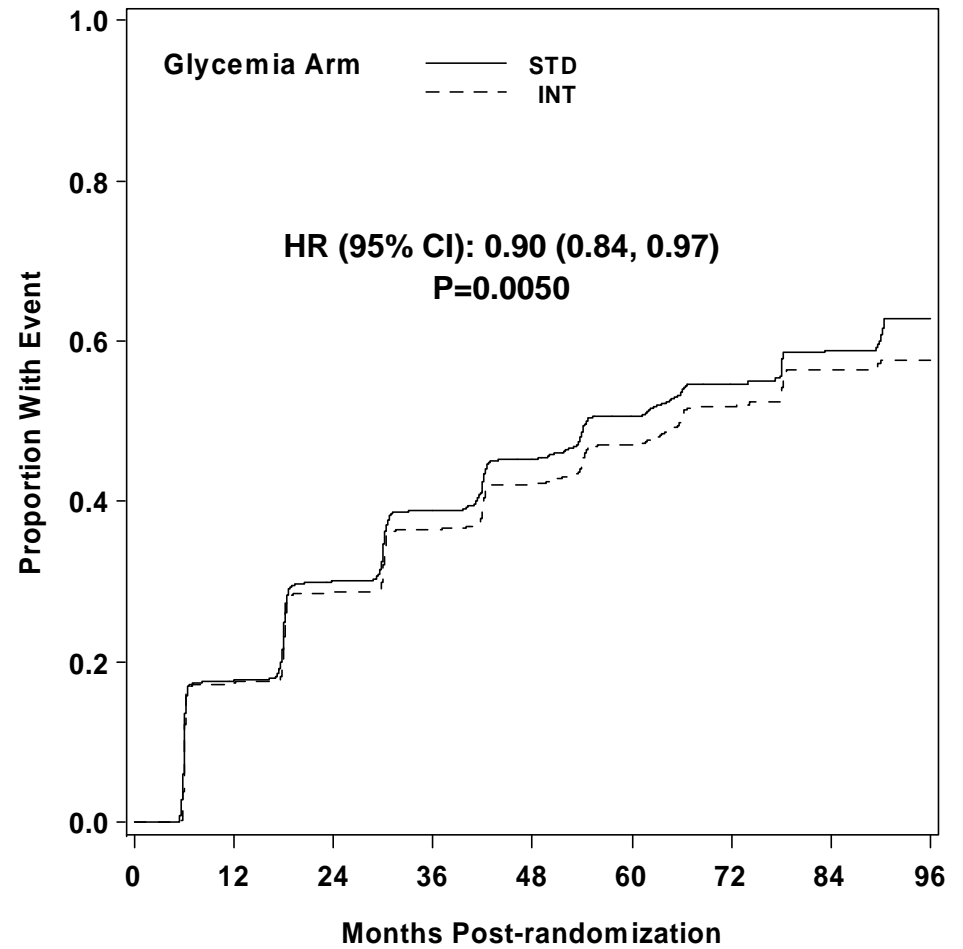

**Follow-up numbers at risk**

| Month | 12   | 24   | 36   | 48   | 60   | 72  | 84  | 96 |
|-------|------|------|------|------|------|-----|-----|----|
|       | 5339 | 4444 | 3795 | 2799 | 1539 | 455 | 225 | 1  |

**Figure A13.** Kaplan-Meier curves for microvascular outcome Neuro-3 (loss of ankle jerk during Jendrassic maneuver) by glycemia arm. Panel A: data until transition of intensive glycemia arm to standard therapy (N=6563). Panel B: all data through end of study (N=6583). Hazard ratios adjusted for baseline history of clinical cardiovascular disease and second trial treatment arm assignment.



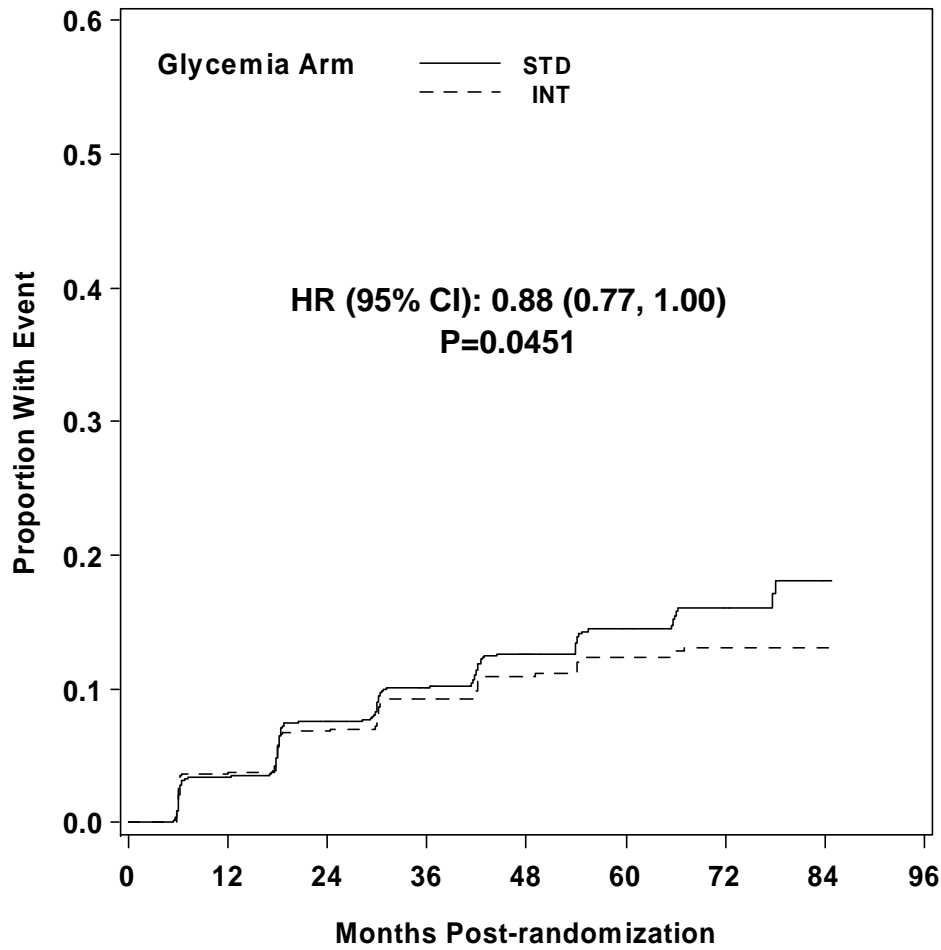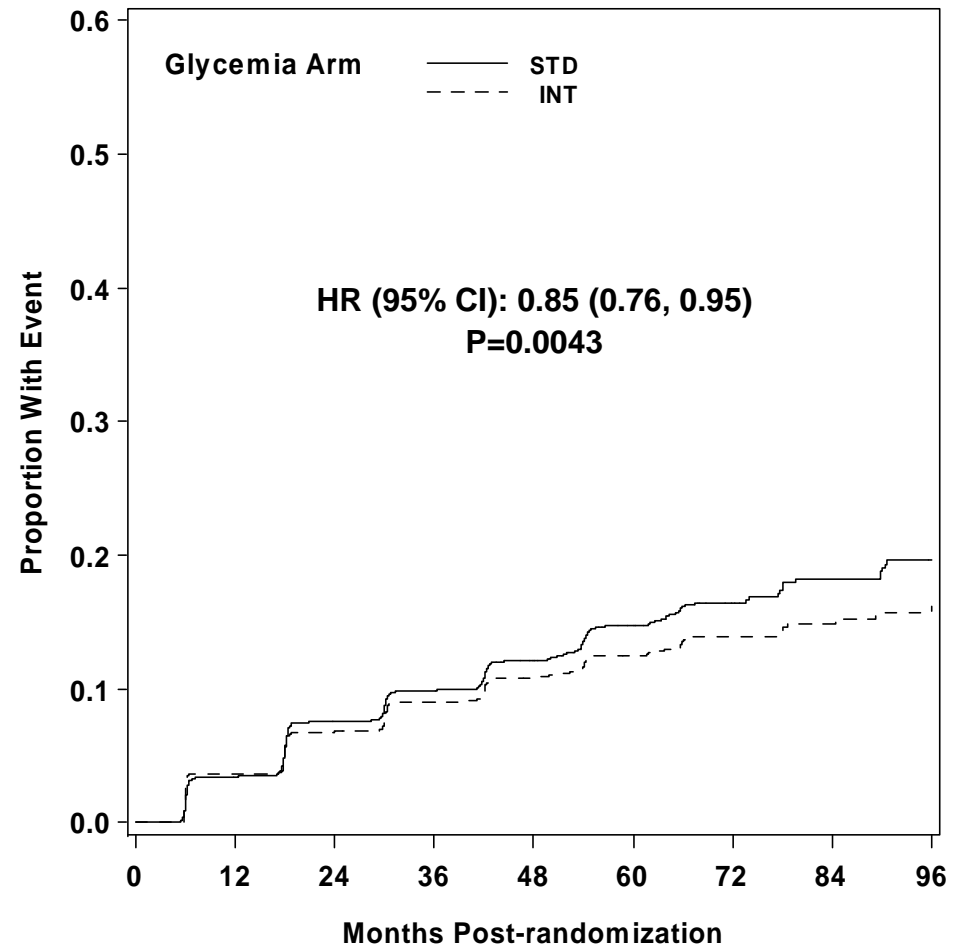

**Follow-up numbers at risk**

| Month | 12   | 24   | 36   | 48   | 60  | 72  | 84 |
|-------|------|------|------|------|-----|-----|----|
|       | 8659 | 7288 | 4754 | 2128 | 699 | 381 | 5  |

**Follow-up numbers at risk**

| Month | 12   | 24   | 36   | 48   | 60   | 72   | 84  | 96  |
|-------|------|------|------|------|------|------|-----|-----|
|       | 8715 | 8174 | 7727 | 6191 | 3638 | 1113 | 634 | 320 |

**Figure A14.** Kaplan-Meier curves for microvascular outcome Neuro-4 (loss light-touch sensation) by glycemia arm. Panel A: data until transition of intensive glycemia arm to standard therapy (N=9141). Panel B: all data through end of study (N=9169). Hazard ratios adjusted for baseline history of clinical cardiovascular disease and second trial treatment arm assignment.
